# Supplementary material for: Superparamagnetic iron oxide nanoparticles (SPIONs) conjugated with lipase Candida antarctica A for biodiesel synthesis
Source: Royal Society of Chemistry journal article supplement (doi:10.1039/d0ra06215d), 2020-01-01
Supplement: d0ra06215d1.pdf [file d0ra06215d1.pdf]

## Supplementary Information

### Superparamagnetic Iron Oxide Nanoparticles (SPIONs) conjugated with Lipase *Candida Antarctica A* for Biodiesel Synthesis

Luis Fernando Peffi Ferreira,<sup>\*a</sup> Thayná Mazzi de Oliveira,<sup>a</sup> Sergio Hiroshi Toma,<sup>b</sup> Marcos Makoto Toyama,<sup>b</sup> Koiti Araki<sup>b</sup> and Luis Humberto Avanzi<sup>c</sup>

<sup>a</sup> Chemical Engineering Department, FEI University Center, São Bernardo do Campo, SP, 09850-901, Brasil.

<sup>b</sup> Chemistry Institute, University of São Paulo, SP, 05508-000, Brazil.

<sup>c</sup> Physics Department, FEI University Center, São Bernardo do Campo, SP, 09850-901, Brasil.

\* Corresponding author: Luis Fernando Peffi Ferreira - lpeffi@fei.edu.br.

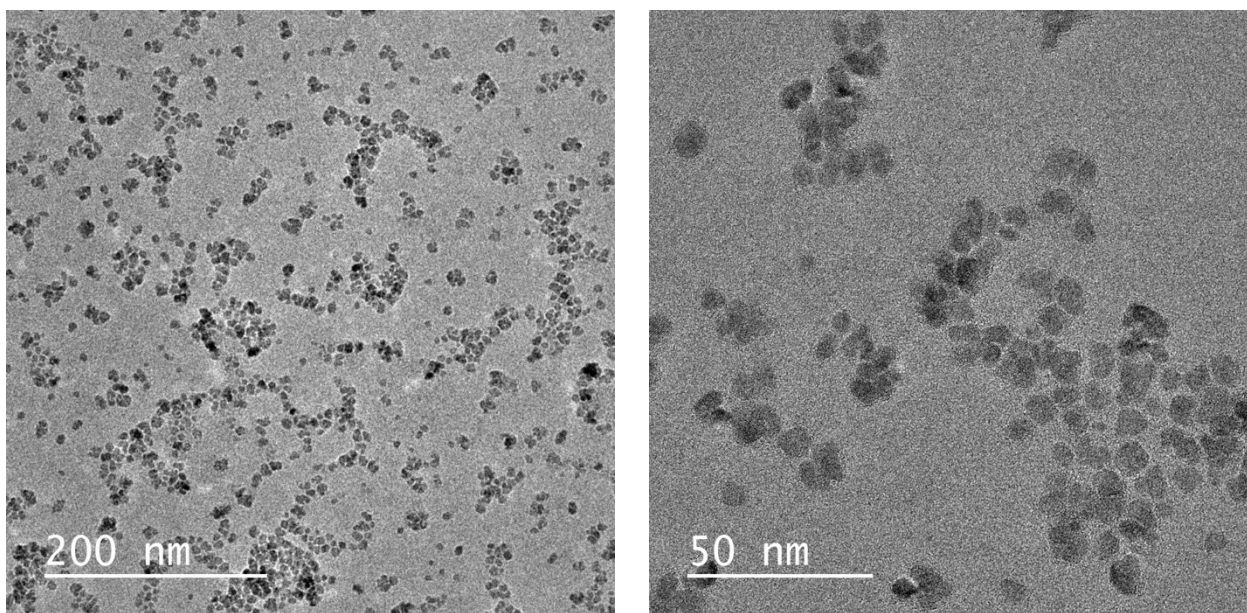

**Figure S1.** TEM images of SPIONs on copper grid (TedPella).

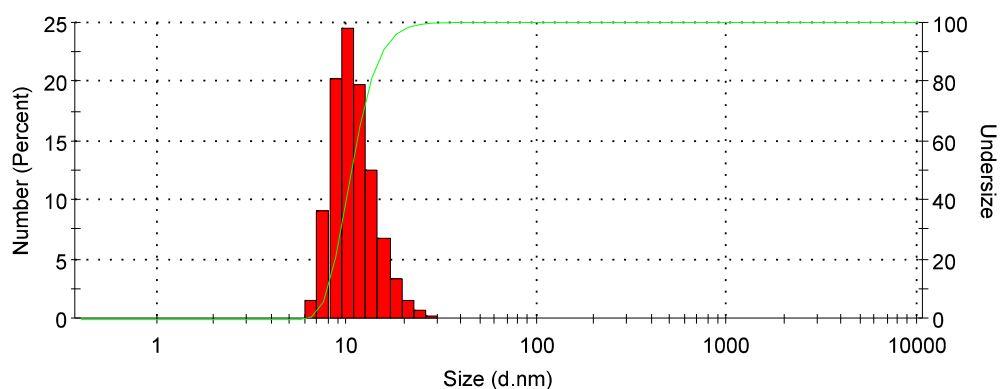

**Figure S2.** Size distribution of SPIONs dispersion in water measured by DLS.

**Table S1.** Average size and Zeta potential of SPION and SPION-CAL-A.

| Nanomaterial | Average Size (nm) | Zeta Potential (mV) |
|--------------|-------------------|---------------------|
| SPION        | <b>11</b>         | <b>+10.2</b>        |
| SPION-CAL-A  | <b>33</b>         | <b>-25.8</b>        |

### **Biodiesel Composition**

Typical biodiesel composition (methyl esters) and retention times in CG-FID and typical chromatogram of biodiesel obtained from soybean oil and methanol (ratio 1: 6), 6 h reaction time and stirring 300 rpm, temperature 60 °C, and 3.0 wt% of catalyst. The average composition in fat acids typical of soybean biodiesel is 11.0% palmitate (16:0), 2.0% stearate (18:0), 20.0% oleate (18:1), 64.0% linoleate (18:2) and 3.0% others.

Table S2: Typical methyl esters retention times.

| GC parameters for methyl esters |          |                    |
|---------------------------------|----------|--------------------|
| Methyl Esters                   | RT (min) | Molar mass (g/mol) |
| Laurate                         | 4,916    | 214.34             |
| Miristate                       | 5,901    | 242.40             |
| Palmitoleate                    | 6,990    | 268.44             |
| Palmitate                       | 7,187    | 270.46             |
| Linolenate                      | 8,526    | 292.47             |
| Linoleate                       | 8,735    | 294.47             |
| Oleate                          | 8,819    | 296.49             |
| Stearate                        | 9,171    | 298.50             |

RT= Retention time

Figure S3: Typical gas chromatogram of a biodiesel sample with a conversion rate of 82-85% using 3.0 wt% of catalyst under the conditions described in the manuscript.

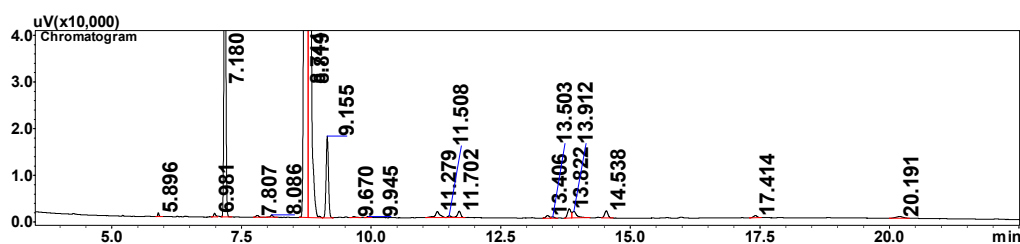

Figure S4: Typical composition of the a biodiesel sample prepared using SPION-CAL-A and Lipozyme 435 (CAL B).

SPIONs-CAL A

biodiesel

slope

1000  $\mu$ V/mL

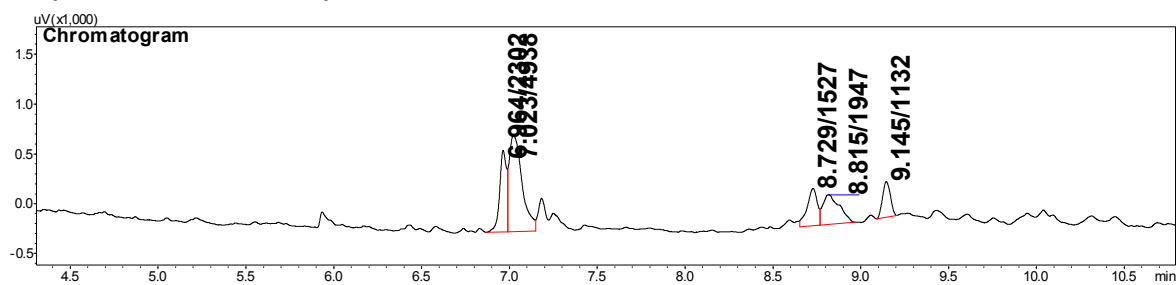

| RT (min) | Area     |
|----------|----------|
| 0,513    | 328966,7 |
| 0,559    | 1,25E+09 |
| 0,858    | 1798,5   |
| 1,689    | 1296,6   |
| 1,894    | 1170,1   |
| 6,964    | 2301,7   |
| 7,023    | 4937,9   |
| 8,729    | 1526,6   |
| 8,815    | 1946,8   |
| 9,145    | 1132,2   |
| 29,307   | 2417,2   |
| 36,219   | 1025,2   |

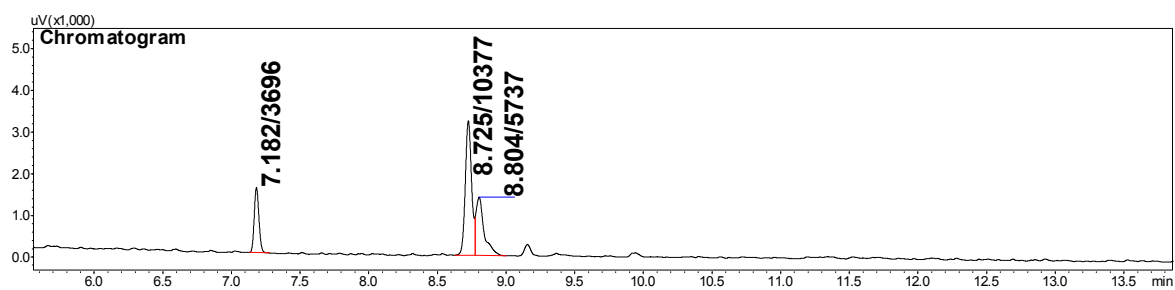

### Lipozyme 435

slope 1000  $\mu\text{V}/\text{mL}$

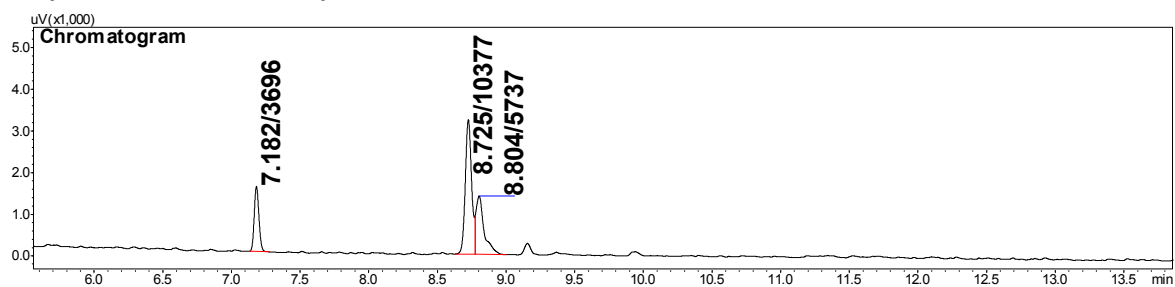

### Reference:

- 1- Dennis Y.C. Leung \*, Xuan Wu, M.K.H. Leung, A review on biodiesel production using catalyzed transesterification; Applied Energy 87 (2010) 1083–1095.
